## Acknowledgement to the Reviewers

The Editors greatly appreciate the support of all reviewers whose comments and scientific evaluation of submitted manuscripts are invaluable for ensuring the scientific quality of this journal. In addition to the listed permanent members of the Board of Reviewing Editors, the following distinguished clinicians and scientists listed below acted as reviewers for *Urologia Internationalis* in 2002. The Editors hereby express their sincere gratitude for and their appreciation of the work done as well as the support given to this journal.

Peter Albers, Bonn  
G. Baretton, Dresden  
Luka Bubendorf, Basel  
Matthias Heitz, Hamburg  
Didier Jacqmin, Strasbourg  
Hubert John, Zürich  
Michael O. Kurrer, Zürich  
Francisco J. Martinez Portillo, Kiel

Gerald H.J. Mickisch, Rotterdam  
Frank Oberpenning, Münster  
D. Perucchini, Zürich  
Jens J. Rassweiler, Heilbronn  
Jörg Schubert, Jena  
Christian G. Stief, Hannover  
Hans-Göran Tiselius, Huddinge
